# Supplementary material for: A novel method for site-specific chemical SUMOylation: SUMOylation of Hsp90 modulates co-chaperone binding in vitro
Source: PubMed Central journal article supplement (PMC9605714; doi:10.1515/hsz-2018-0251), 2019-04-24
Supplement: j_hsz-2018-0251_suppl.pdf [file j_hsz-2018-0251_suppl.pdf]

**A novel method for site-specific chemical SUMOylation: SUMOylation of Hsp90 modulates co-chaperone binding *in vitro***

Annemarie Wolmarans, Allison Kwantes and Paul LaPointe

**Supplementary material**

Supplemental  
Figure 1a

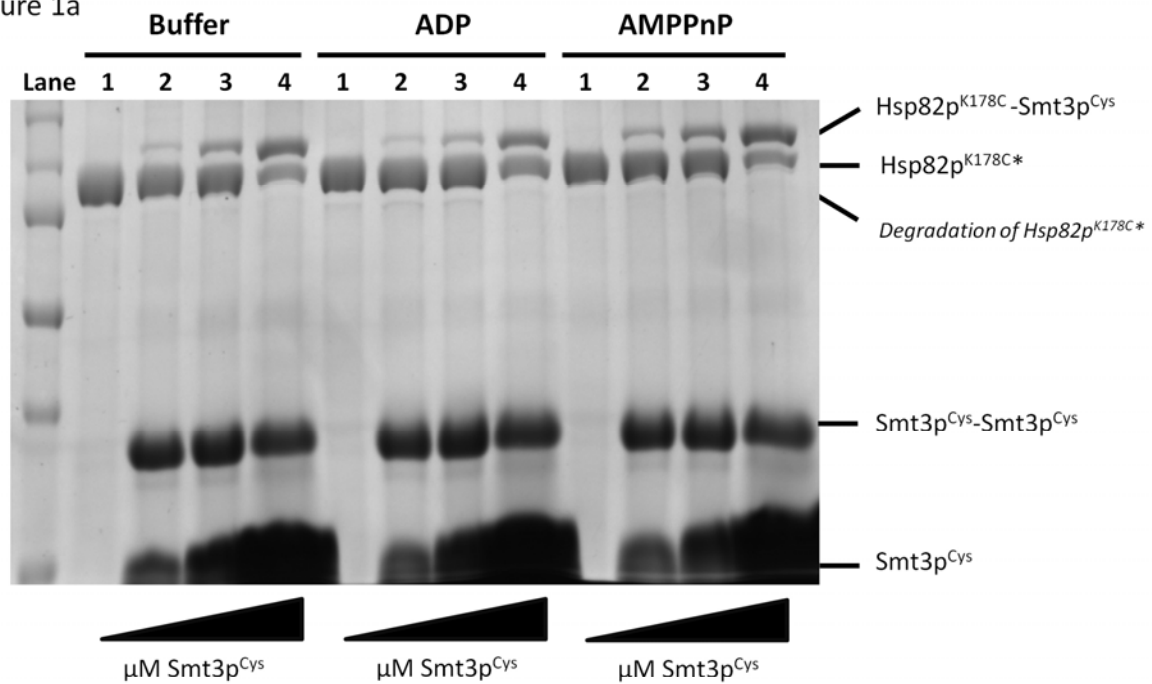

Supplemental  
Figure 1b

Band Intensity Analysis of Titration Assay

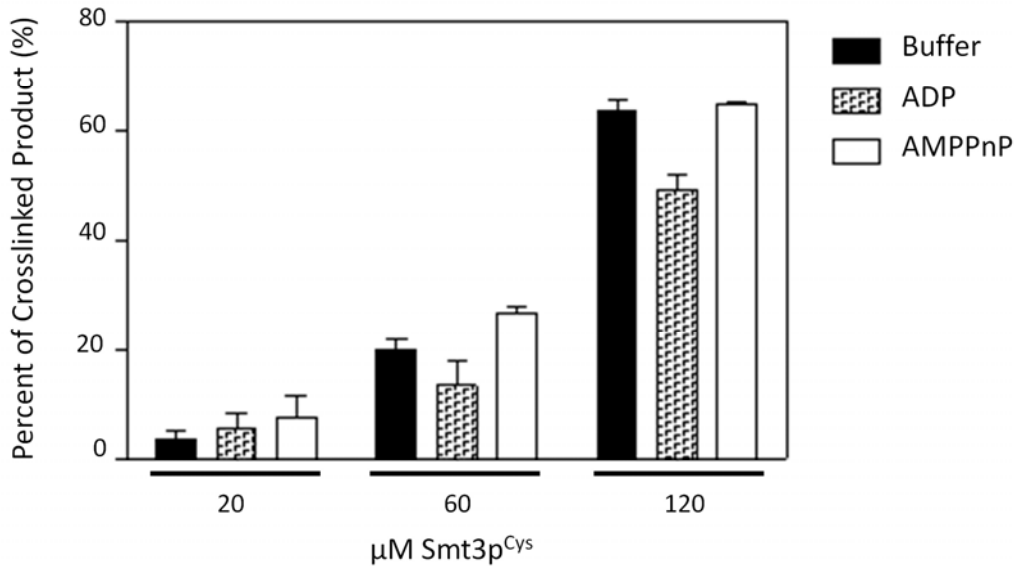

**Supplementary Figure 1** Hsp82p<sup>K178C</sup> derivatization and conjugation to Smt3p<sup>Cys</sup> performed under different nucleotide conditions in a titration assay.

**A.** Less SUMOylated product is produced in ADP conditions compared to buffer or AMPPnP conditions. Each reaction contains 2 μM Hsp82p<sup>K178C\*</sup>, 5 mM nucleotide (buffer, ADP, or AMPPnP), and the indicated amount of Smt3p<sup>Cys</sup> (0, 20, 60, or 120 μM). A representative gel of the titration experiments is shown. **B.** Band intensity analysis of titration experiments show there is no statistically significant difference in the percent of crosslinked product (Hsp82p<sup>K178C</sup>-Smt3p<sup>Cys</sup>) between the three conditions. Band intensities were measured of crosslinking reactions shown in (A), analyzed as described in methods, and results plotted in a bar graph. The average percent of crosslinked product with the standard error of the mean for buffer (black), ADP (grey), and AMPPnP (white) conditions are shown from three experiments (n=3).

Supplemental  
Figure 2a

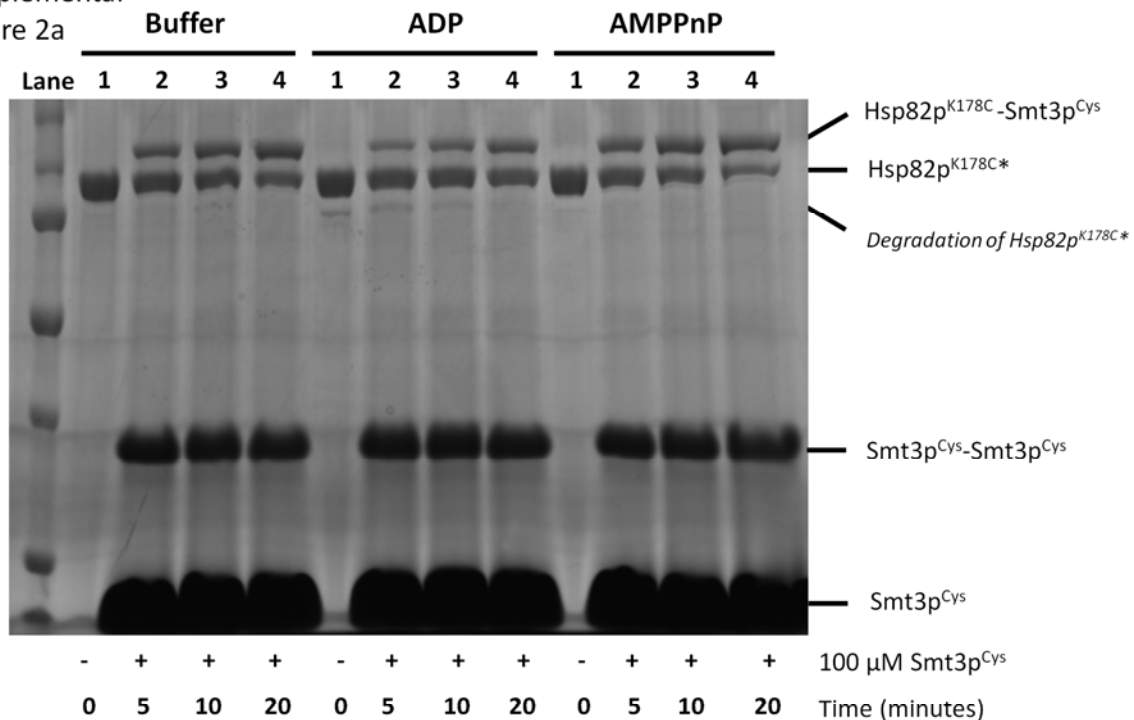

Supplemental  
Figure 2b

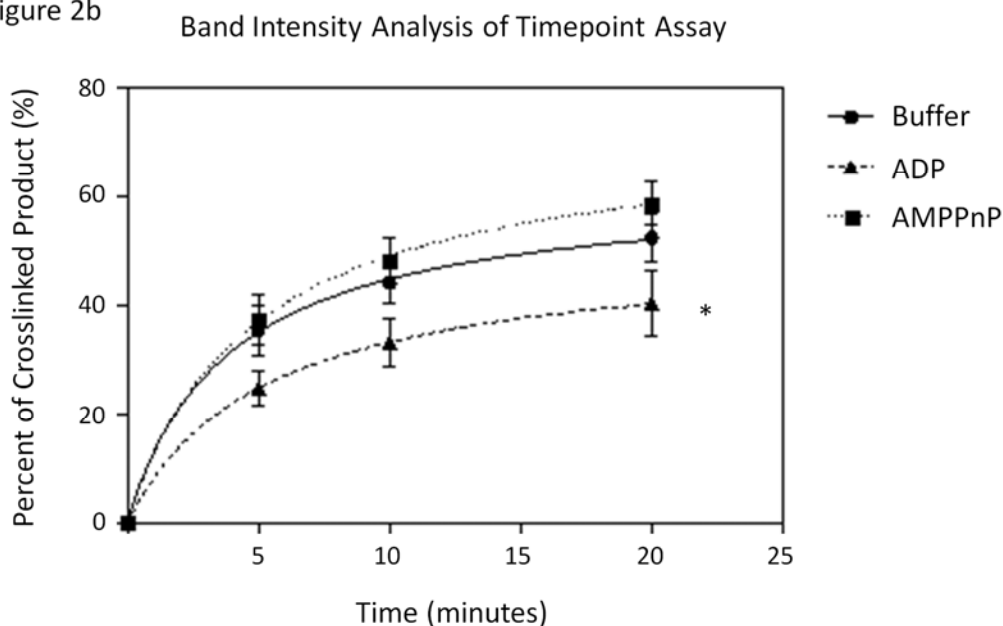

**Supplementary Figure 2** Hsp82p<sup>K178C</sup> derivatization and conjugation to Smt3p<sup>Cys</sup> performed under different nucleotide conditions in a timepoint assay.

**A.** ADP conditions results in a slower rate of chemical SUMOylation. Each reaction contains 2 μM Hsp82p<sup>K178C</sup>\*, 5 mM nucleotide (buffer, ADP, or AMPPnP), and either 0 or 100 μM Smt3p<sup>Cys</sup>. Reactions were stopped at indicated timepoints by quenching the reaction with 30 mM DTT. A representative gel of the timepoint experiments is shown. **B.** Band intensity analysis of timepoint experiments show ADP conditions results in a statistically significant decrease in the percent of crosslinked product (Hsp82p<sup>K178C</sup>-Smt3p<sup>Cys</sup>) compared to the buffer and AMPPnP conditions (\* - one-way ANOVA,  $p < 0.05$ ). Band intensities were measured of crosslinking reactions shown in (A), analyzed as described in methods, and results plotted in a XY plot. The average percent of crosslinked product with the standard error of the mean for buffer (circles; solid line), ADP (triangles; dashed line), and AMPPnP (squares; stippled line) conditions are shown from three experiments ( $n=3$ ).
